# Supplementary material for: Discovery of highly efficient dual-atom catalysts for propane dehydrogenation assisted by machine learning
Source: Royal Society of Chemistry journal article supplement (doi:10.1039/d4cp02219j), 2024-01-01
Supplement: d4cp02219j1.pdf [file d4cp02219j1.pdf]

## Supporting Information

### Discovery of High-Efficient Dual-atom Catalysts for Propane Dehydrogenation Assisted by Machine Learning

Xianpeng Wang<sup>a,b</sup>, Yanxia Ma<sup>b</sup>, Youyong Li<sup>a,b</sup>, Lu Wang<sup>b\*</sup>, Lifeng Chi<sup>a,b\*</sup>

*<sup>a</sup>Macao Institute of Materials Science and Engineering, Macau University of Science and Technology, Taipa, Macau SAR 999078, China.*

*<sup>b</sup>Institute of Functional Nano & Soft Materials (FUNSOM), Jiangsu Key Laboratory for Carbon-Based Functional Materials & Devices, Soochow University, Suzhou, Jiangsu 215123, China.*

**Table S1.** The 11 descriptors related to the DACs are summarized. The average bond lengths between  $M_1/M_2$  atom and the surrounding O atoms ( $d_{M_1-O}$  and  $d_{M_2-O}$ , Å), the distance of  $M_1$  and  $M_2$  atoms ( $d_{M_1-M_2}$ , Å), the electronegativity of  $M_1$  and  $M_2$  atoms ( $P_{M_1}$  and  $P_{M_2}$ ), the electron affinity of  $M_1$  and  $M_2$  atoms ( $A_{M_1}$  and  $A_{M_2}$ , kJ/mol), the first ionization energy of  $M_1$  and  $M_2$  atoms ( $I_{M_1}$  and  $I_{M_2}$ , kJ/mol), and the number of  $d$ -electrons for  $M_1$  and  $M_2$  atoms ( $N_{d-M_1}$  and  $N_{d-M_2}$ ).

| DACs | $d_{M_1-O}$ | $d_{M_2-O}$ | $d_{M_1-M_2}$ | $P_{M_1}$ | $P_{M_2}$ | $A_{M_1}$ | $A_{M_2}$ | $I_{M_1}$ | $I_{M_2}$ | $N_{d-M_1}$ | $N_{d-M_2}$ |
|------|-------------|-------------|---------------|-----------|-----------|-----------|-----------|-----------|-----------|-------------|-------------|
| CuSc | 1.85        | 2.11        | 2.88          | 1.90      | 1.36      | 118.40    | 18.10     | 745.50    | 633.10    | 10.00       | 0.00        |
| CuTi | 1.95        | 1.98        | 2.75          | 1.90      | 1.54      | 118.40    | 7.60      | 745.50    | 658.80    | 10.00       | 2.00        |
| CuV  | 1.94        | 1.96        | 2.73          | 1.90      | 1.63      | 118.40    | 50.60     | 745.50    | 650.90    | 10.00       | 3.00        |
| CuCr | 1.85        | 2.04        | 2.87          | 1.90      | 1.66      | 118.40    | 64.30     | 745.50    | 652.90    | 10.00       | 5.00        |
| CuMn | 1.86        | 2.00        | 2.82          | 1.90      | 1.55      | 118.40    | 0.00      | 745.50    | 717.30    | 10.00       | 5.00        |
| CuFe | 1.85        | 2.07        | 2.89          | 1.90      | 1.83      | 118.40    | 15.70     | 745.50    | 762.50    | 10.00       | 6.00        |
| CuCo | 1.85        | 2.08        | 2.92          | 1.90      | 1.88      | 118.40    | 63.70     | 745.50    | 760.40    | 10.00       | 7.00        |
| CuNi | 1.85        | 2.04        | 2.85          | 1.90      | 1.91      | 118.40    | 112.00    | 745.50    | 737.10    | 10.00       | 8.00        |
| CuZn | 1.85        | 2.15        | 2.94          | 1.90      | 1.65      | 118.40    | 0.00      | 745.50    | 906.40    | 10.00       | 10.00       |
| CuGa | 1.85        | 2.04        | 2.89          | 1.90      | 1.81      | 118.40    | 28.90     | 745.50    | 578.80    | 10.00       | 10.00       |
| CuGe | 1.95        | 1.93        | 2.79          | 1.90      | 2.01      | 118.40    | 119.00    | 745.50    | 762.00    | 10.00       | 10.00       |
| CuZr | 1.95        | 2.10        | 2.78          | 1.90      | 1.33      | 118.40    | 41.10     | 745.50    | 640.10    | 10.00       | 2.00        |
| CuNb | 2.09        | 2.00        | 2.71          | 1.90      | 1.60      | 118.40    | 86.10     | 745.50    | 652.10    | 10.00       | 4.00        |
| CuMo | 1.96        | 2.04        | 2.72          | 1.90      | 2.16      | 118.40    | 71.90     | 745.50    | 684.30    | 10.00       | 5.00        |
| CuRu | 1.89        | 2.06        | 2.82          | 1.90      | 2.20      | 118.40    | 101.30    | 745.50    | 710.20    | 10.00       | 7.00        |
| CuRh | 1.85        | 2.10        | 2.88          | 1.90      | 2.28      | 118.40    | 109.70    | 745.50    | 719.70    | 10.00       | 8.00        |
| CuPd | 1.85        | 2.10        | 2.87          | 1.90      | 2.20      | 118.40    | 53.70     | 745.50    | 804.40    | 10.00       | 10.00       |
| CuAg | 1.85        | 2.21        | 2.90          | 1.90      | 1.93      | 118.40    | 125.60    | 745.50    | 731.00    | 10.00       | 10.00       |
| CuIn | 1.85        | 2.18        | 2.92          | 1.90      | 1.78      | 118.40    | 28.90     | 745.50    | 558.30    | 10.00       | 10.00       |
| CuSn | 1.94        | 2.07        | 2.86          | 1.90      | 1.96      | 118.40    | 107.30    | 745.50    | 708.60    | 10.00       | 10.00       |
| CuHf | 1.95        | 2.08        | 2.79          | 1.90      | 1.30      | 118.40    | 0.00      | 745.50    | 658.50    | 10.00       | 2.00        |
| CuTa | 2.10        | 2.00        | 2.70          | 1.90      | 1.50      | 118.40    | 31.00     | 745.50    | 761.00    | 10.00       | 3.00        |
| CuW  | 2.01        | 2.01        | 2.72          | 1.90      | 2.36      | 118.40    | 78.60     | 745.50    | 770.00    | 10.00       | 4.00        |
| CuRe | 1.95        | 2.04        | 2.82          | 1.90      | 1.90      | 118.40    | 14.50     | 745.50    | 760.00    | 10.00       | 5.00        |
| CuOs | 1.94        | 2.03        | 2.81          | 1.90      | 2.20      | 118.40    | 106.10    | 745.50    | 840.00    | 10.00       | 6.00        |
| CuIr | 1.86        | 2.11        | 2.89          | 1.90      | 2.20      | 118.40    | 151.00    | 745.50    | 880.00    | 10.00       | 7.00        |
| CuPt | 1.85        | 2.09        | 2.87          | 1.90      | 2.28      | 118.40    | 205.30    | 745.50    | 870.00    | 10.00       | 9.00        |
| CuAu | 1.85        | 2.11        | 2.88          | 1.90      | 2.54      | 118.40    | 222.80    | 745.50    | 890.10    | 10.00       | 10.00       |
| CuBi | 1.85        | 2.28        | 2.93          | 1.90      | 2.02      | 118.40    | 91.20     | 745.50    | 703.00    | 10.00       | 10.00       |
| PdAg | 1.98        | 2.21        | 2.90          | 2.20      | 1.93      | 53.70     | 125.60    | 804.40    | 731.00    | 10.00       | 10.00       |
| PdAu | 1.99        | 2.10        | 2.89          | 2.20      | 2.54      | 53.70     | 222.80    | 804.40    | 890.10    | 10.00       | 10.00       |
| PdBi | 1.99        | 2.28        | 2.88          | 2.20      | 2.02      | 53.70     | 91.20     | 804.40    | 703.00    | 10.00       | 10.00       |
| PdGa | 1.99        | 2.03        | 2.90          | 2.20      | 1.81      | 53.70     | 28.90     | 804.40    | 578.80    | 10.00       | 10.00       |
| PdGe | 2.02        | 1.92        | 2.84          | 2.20      | 2.01      | 53.70     | 119.00    | 804.40    | 762.00    | 10.00       | 10.00       |
| PdCo | 1.99        | 2.09        | 2.87          | 2.20      | 1.88      | 53.70     | 63.70     | 804.40    | 760.40    | 10.00       | 7.00        |
| PdCr | 2.00        | 1.99        | 2.81          | 2.20      | 1.66      | 53.70     | 64.30     | 804.40    | 652.90    | 10.00       | 5.00        |

|      |      |      |      |      |      |        |        |        |        |       |       |
|------|------|------|------|------|------|--------|--------|--------|--------|-------|-------|
| PdFe | 1.99 | 2.07 | 2.83 | 2.20 | 1.83 | 53.70  | 15.70  | 804.40 | 762.50 | 10.00 | 6.00  |
| PdHf | 2.02 | 2.09 | 2.72 | 2.20 | 1.30 | 53.70  | 0.00   | 804.40 | 658.50 | 10.00 | 2.00  |
| PdIn | 1.99 | 2.18 | 2.88 | 2.20 | 1.78 | 53.70  | 28.90  | 804.40 | 558.30 | 10.00 | 10.00 |
| PdIr | 2.01 | 2.05 | 2.79 | 2.20 | 2.20 | 53.70  | 151.00 | 804.40 | 880.00 | 10.00 | 7.00  |
| PdMn | 2.00 | 2.00 | 2.82 | 2.20 | 1.55 | 53.70  | 0.00   | 804.40 | 717.30 | 10.00 | 5.00  |
| PdMo | 2.01 | 2.07 | 2.64 | 2.20 | 2.16 | 53.70  | 71.90  | 804.40 | 684.30 | 10.00 | 5.00  |
| PdNb | 2.02 | 2.07 | 2.69 | 2.20 | 1.60 | 53.70  | 86.10  | 804.40 | 652.10 | 10.00 | 4.00  |
| PdNi | 1.99 | 2.01 | 2.86 | 2.20 | 1.91 | 53.70  | 112.00 | 804.40 | 737.10 | 10.00 | 8.00  |
| PdOs | 2.02 | 2.04 | 2.79 | 2.20 | 2.20 | 53.70  | 106.10 | 804.40 | 840.00 | 10.00 | 6.00  |
| PdPt | 1.99 | 2.08 | 2.89 | 2.20 | 2.28 | 53.70  | 205.30 | 804.40 | 870.00 | 10.00 | 9.00  |
| PdRe | 2.02 | 2.06 | 2.79 | 2.20 | 1.90 | 53.70  | 14.50  | 804.40 | 760.00 | 10.00 | 5.00  |
| PdRh | 1.99 | 2.07 | 2.88 | 2.20 | 2.28 | 53.70  | 109.70 | 804.40 | 719.70 | 10.00 | 8.00  |
| PdRu | 2.01 | 2.05 | 2.66 | 2.20 | 2.20 | 53.70  | 101.30 | 804.40 | 710.20 | 10.00 | 7.00  |
| PdSc | 1.99 | 2.12 | 2.83 | 2.20 | 1.36 | 53.70  | 18.10  | 804.40 | 633.10 | 10.00 | 0.00  |
| PdSn | 2.02 | 2.09 | 2.81 | 2.20 | 1.96 | 53.70  | 107.30 | 804.40 | 708.60 | 10.00 | 10.00 |
| PdTa | 2.19 | 2.01 | 2.58 | 2.20 | 1.50 | 53.70  | 31.00  | 804.40 | 761.00 | 10.00 | 3.00  |
| PdTi | 2.02 | 2.00 | 2.69 | 2.20 | 1.54 | 53.70  | 7.60   | 804.40 | 658.80 | 10.00 | 2.00  |
| PdW  | 2.02 | 2.05 | 2.69 | 2.20 | 2.36 | 53.70  | 78.60  | 804.40 | 770.00 | 10.00 | 4.00  |
| PdZn | 1.98 | 2.16 | 2.97 | 2.20 | 1.65 | 53.70  | 0.00   | 804.40 | 906.40 | 10.00 | 10.00 |
| PdZr | 2.02 | 2.11 | 2.72 | 2.20 | 1.33 | 53.70  | 41.10  | 804.40 | 640.10 | 10.00 | 2.00  |
| SnAg | 2.00 | 2.28 | 2.92 | 1.96 | 1.93 | 107.30 | 125.60 | 708.60 | 731.00 | 10.00 | 10.00 |
| SnAu | 2.00 | 2.25 | 2.93 | 1.96 | 2.54 | 107.30 | 222.80 | 708.60 | 890.10 | 10.00 | 10.00 |
| SnBi | 2.12 | 2.28 | 2.98 | 1.96 | 2.02 | 107.30 | 91.20  | 708.60 | 703.00 | 10.00 | 10.00 |
| SnCr | 2.10 | 2.04 | 2.94 | 1.96 | 1.66 | 107.30 | 64.30  | 708.60 | 652.90 | 10.00 | 5.00  |
| SnGa | 2.09 | 2.03 | 2.99 | 1.96 | 1.81 | 107.30 | 28.90  | 708.60 | 578.80 | 10.00 | 10.00 |
| SnGe | 2.00 | 2.26 | 3.03 | 1.96 | 2.01 | 107.30 | 119.00 | 708.60 | 762.00 | 10.00 | 10.00 |
| SnMn | 2.11 | 1.99 | 2.92 | 1.96 | 1.55 | 107.30 | 0.00   | 708.60 | 717.30 | 10.00 | 5.00  |
| SnPt | 2.12 | 2.09 | 2.89 | 1.96 | 2.28 | 107.30 | 205.30 | 708.60 | 870.00 | 10.00 | 9.00  |
| SnRh | 2.12 | 2.09 | 2.86 | 1.96 | 2.28 | 107.30 | 109.70 | 708.60 | 719.70 | 10.00 | 8.00  |
| SnCo | 1.99 | 2.16 | 2.97 | 1.96 | 1.88 | 107.30 | 63.70  | 708.60 | 760.40 | 10.00 | 7.00  |
| SnFe | 2.00 | 2.17 | 2.95 | 1.96 | 1.83 | 107.30 | 15.70  | 708.60 | 762.50 | 10.00 | 6.00  |
| SnHf | 2.26 | 2.08 | 3.10 | 1.96 | 1.30 | 107.30 | 0.00   | 708.60 | 658.50 | 10.00 | 2.00  |
| SnIn | 2.11 | 2.18 | 3.02 | 1.96 | 1.78 | 107.30 | 28.90  | 708.60 | 558.30 | 10.00 | 10.00 |
| SnIr | 2.23 | 2.05 | 2.91 | 1.96 | 2.20 | 107.30 | 151.00 | 708.60 | 880.00 | 10.00 | 7.00  |
| SnMo | 2.27 | 2.04 | 3.00 | 1.96 | 2.16 | 107.30 | 71.90  | 708.60 | 684.30 | 10.00 | 5.00  |
| SnNb | 2.29 | 2.05 | 3.03 | 1.96 | 1.60 | 107.30 | 86.10  | 708.60 | 652.10 | 10.00 | 4.00  |
| SnNi | 1.99 | 2.14 | 2.96 | 1.96 | 1.91 | 107.30 | 112.00 | 708.60 | 737.10 | 10.00 | 8.00  |
| SnOs | 2.25 | 2.03 | 2.92 | 1.96 | 2.20 | 107.30 | 106.10 | 708.60 | 840.00 | 10.00 | 6.00  |
| SnRe | 2.24 | 2.05 | 2.99 | 1.96 | 1.90 | 107.30 | 14.50  | 708.60 | 760.00 | 10.00 | 5.00  |
| SnRu | 2.24 | 2.02 | 2.93 | 1.96 | 2.20 | 107.30 | 101.30 | 708.60 | 710.20 | 10.00 | 7.00  |
| SnSc | 2.11 | 2.11 | 3.01 | 1.96 | 1.36 | 107.30 | 18.10  | 708.60 | 633.10 | 10.00 | 0.00  |
| SnTa | 2.35 | 2.03 | 3.03 | 1.96 | 1.50 | 107.30 | 31.00  | 708.60 | 761.00 | 10.00 | 3.00  |
| SnTi | 2.26 | 1.99 | 3.07 | 1.96 | 1.54 | 107.30 | 7.60   | 708.60 | 658.80 | 10.00 | 2.00  |
| SnW  | 2.29 | 2.03 | 2.99 | 1.96 | 2.36 | 107.30 | 78.60  | 708.60 | 770.00 | 10.00 | 4.00  |

|      |      |      |      |      |      |        |        |        |        |       |       |
|------|------|------|------|------|------|--------|--------|--------|--------|-------|-------|
| SnZn | 1.99 | 2.16 | 3.00 | 1.96 | 1.65 | 107.30 | 0.00   | 708.60 | 906.40 | 10.00 | 10.00 |
| SnZr | 2.26 | 2.10 | 3.10 | 1.96 | 1.33 | 107.30 | 41.10  | 708.60 | 640.10 | 10.00 | 2.00  |
| PtAg | 1.98 | 2.24 | 2.93 | 2.28 | 1.93 | 205.30 | 125.60 | 870.00 | 731.00 | 9.00  | 10.00 |
| PtAu | 2.00 | 2.12 | 2.92 | 2.28 | 2.54 | 205.30 | 222.80 | 870.00 | 890.10 | 9.00  | 10.00 |
| PtBi | 2.01 | 2.29 | 2.89 | 2.28 | 2.02 | 205.30 | 91.20  | 870.00 | 703.00 | 9.00  | 10.00 |
| PtGa | 2.01 | 2.02 | 2.92 | 2.28 | 1.81 | 205.30 | 28.90  | 870.00 | 578.80 | 9.00  | 10.00 |
| PtGe | 2.03 | 1.92 | 2.87 | 2.28 | 2.01 | 205.30 | 119.00 | 870.00 | 762.00 | 9.00  | 10.00 |
| PtRh | 2.00 | 2.06 | 2.86 | 2.28 | 2.28 | 205.30 | 109.70 | 870.00 | 719.70 | 9.00  | 8.00  |
| PtCo | 2.00 | 2.10 | 2.80 | 2.28 | 1.88 | 205.30 | 63.70  | 870.00 | 760.40 | 9.00  | 7.00  |
| PtCr | 2.01 | 2.03 | 2.87 | 2.28 | 1.66 | 205.30 | 64.30  | 870.00 | 652.90 | 9.00  | 5.00  |
| PtFe | 2.01 | 2.08 | 2.80 | 2.28 | 1.83 | 205.30 | 15.70  | 870.00 | 762.50 | 9.00  | 6.00  |
| PtHf | 2.03 | 2.11 | 2.67 | 2.28 | 1.30 | 205.30 | 0.00   | 870.00 | 658.50 | 9.00  | 2.00  |
| PtIn | 2.01 | 2.19 | 2.88 | 2.28 | 1.78 | 205.30 | 28.90  | 870.00 | 558.30 | 9.00  | 10.00 |
| PtIr | 2.01 | 2.07 | 2.76 | 2.28 | 2.20 | 205.30 | 151.00 | 870.00 | 880.00 | 9.00  | 7.00  |
| PtMn | 2.01 | 2.00 | 2.83 | 2.28 | 1.55 | 205.30 | 0.00   | 870.00 | 717.30 | 9.00  | 5.00  |
| PtMo | 2.02 | 2.09 | 2.59 | 2.28 | 2.16 | 205.30 | 71.90  | 870.00 | 684.30 | 9.00  | 5.00  |
| PtNb | 2.02 | 2.09 | 2.63 | 2.28 | 1.60 | 205.30 | 86.10  | 870.00 | 652.10 | 9.00  | 4.00  |
| PtNi | 1.99 | 2.11 | 2.84 | 2.28 | 1.91 | 205.30 | 112.00 | 870.00 | 737.10 | 9.00  | 8.00  |
| PtOs | 2.01 | 2.07 | 2.60 | 2.28 | 2.20 | 205.30 | 106.10 | 870.00 | 840.00 | 9.00  | 6.00  |
| PtRe | 2.03 | 2.07 | 2.74 | 2.28 | 1.90 | 205.30 | 14.50  | 870.00 | 760.00 | 9.00  | 5.00  |
| PtRu | 2.01 | 2.05 | 2.76 | 2.28 | 2.20 | 205.30 | 101.30 | 870.00 | 710.20 | 9.00  | 7.00  |
| PtSc | 2.01 | 2.12 | 2.81 | 2.28 | 1.36 | 205.30 | 18.10  | 870.00 | 633.10 | 9.00  | 0.00  |
| PtTa | 2.03 | 2.06 | 2.64 | 2.28 | 1.50 | 205.30 | 31.00  | 870.00 | 761.00 | 9.00  | 3.00  |
| PtTi | 2.02 | 2.03 | 2.60 | 2.28 | 1.54 | 205.30 | 7.60   | 870.00 | 658.80 | 9.00  | 2.00  |
| PtW  | 2.02 | 2.07 | 2.63 | 2.28 | 2.36 | 205.30 | 78.60  | 870.00 | 770.00 | 9.00  | 4.00  |
| PtZn | 1.98 | 2.17 | 3.00 | 2.28 | 1.65 | 205.30 | 0.00   | 870.00 | 906.40 | 9.00  | 10.00 |
| PtZr | 2.02 | 2.13 | 2.67 | 2.28 | 1.33 | 205.30 | 41.10  | 870.00 | 640.10 | 9.00  | 2.00  |
| VAg  | 1.84 | 2.35 | 2.92 | 1.63 | 1.93 | 50.60  | 125.60 | 650.90 | 731.00 | 3.00  | 10.00 |
| VAu  | 1.86 | 2.35 | 2.80 | 1.63 | 2.54 | 50.60  | 222.80 | 650.90 | 890.10 | 3.00  | 10.00 |
| VBi  | 1.93 | 2.28 | 2.98 | 1.63 | 2.02 | 50.60  | 91.20  | 650.90 | 703.00 | 3.00  | 10.00 |
| VCo  | 1.88 | 2.14 | 2.81 | 1.63 | 1.88 | 50.60  | 63.70  | 650.90 | 760.40 | 3.00  | 7.00  |
| VCr  | 1.90 | 2.06 | 2.91 | 1.63 | 1.66 | 50.60  | 64.30  | 650.90 | 652.90 | 3.00  | 5.00  |
| VFe  | 1.89 | 2.14 | 2.79 | 1.63 | 1.83 | 50.60  | 15.70  | 650.90 | 762.50 | 3.00  | 6.00  |
| VGa  | 1.93 | 2.04 | 2.94 | 1.63 | 1.81 | 50.60  | 28.90  | 650.90 | 578.80 | 3.00  | 10.00 |
| VGe  | 1.88 | 2.29 | 3.14 | 1.63 | 2.01 | 50.60  | 119.00 | 650.90 | 762.00 | 3.00  | 10.00 |
| VIn  | 1.92 | 2.19 | 2.98 | 1.63 | 1.78 | 50.60  | 28.90  | 650.90 | 558.30 | 3.00  | 10.00 |
| VMn  | 1.88 | 2.15 | 2.91 | 1.63 | 1.55 | 50.60  | 0.00   | 650.90 | 717.30 | 3.00  | 5.00  |
| VNi  | 1.88 | 2.14 | 2.84 | 1.63 | 1.91 | 50.60  | 112.00 | 650.90 | 737.10 | 3.00  | 8.00  |
| VPd  | 1.88 | 2.16 | 2.75 | 1.63 | 2.20 | 50.60  | 53.70  | 650.90 | 804.40 | 3.00  | 10.00 |
| VPt  | 1.90 | 2.11 | 2.65 | 1.63 | 2.28 | 50.60  | 205.30 | 650.90 | 870.00 | 3.00  | 9.00  |
| VRh  | 1.90 | 2.13 | 2.63 | 1.63 | 2.28 | 50.60  | 109.70 | 650.90 | 719.70 | 3.00  | 8.00  |
| VSn  | 1.88 | 2.37 | 3.17 | 1.63 | 1.96 | 50.60  | 107.30 | 650.90 | 708.60 | 3.00  | 10.00 |
| VZn  | 1.87 | 2.17 | 2.96 | 1.63 | 1.65 | 50.60  | 0.00   | 650.90 | 906.40 | 3.00  | 10.00 |
| VHf  | 1.97 | 2.10 | 2.75 | 1.63 | 1.30 | 50.60  | 0.00   | 650.90 | 658.50 | 3.00  | 2.00  |

|     |      |      |      |      |      |       |        |        |        |      |      |
|-----|------|------|------|------|------|-------|--------|--------|--------|------|------|
| VIr | 1.91 | 2.11 | 2.57 | 1.63 | 2.20 | 50.60 | 151.00 | 650.90 | 880.00 | 3.00 | 7.00 |
| VMo | 1.93 | 2.14 | 2.48 | 1.63 | 2.16 | 50.60 | 71.90  | 650.90 | 684.30 | 3.00 | 5.00 |
| VNb | 1.95 | 2.12 | 2.71 | 1.63 | 1.60 | 50.60 | 86.10  | 650.90 | 652.10 | 3.00 | 4.00 |
| VOs | 1.94 | 2.11 | 2.48 | 1.63 | 2.20 | 50.60 | 106.10 | 650.90 | 840.00 | 3.00 | 6.00 |
| VRe | 1.93 | 2.11 | 2.43 | 1.63 | 1.90 | 50.60 | 14.50  | 650.90 | 760.00 | 3.00 | 5.00 |
| VRu | 1.92 | 2.12 | 2.56 | 1.63 | 2.20 | 50.60 | 101.30 | 650.90 | 710.20 | 3.00 | 7.00 |
| VSc | 1.90 | 2.12 | 2.89 | 1.63 | 1.36 | 50.60 | 18.10  | 650.90 | 633.10 | 3.00 | 0.00 |
| VTa | 1.98 | 2.08 | 2.58 | 1.63 | 1.50 | 50.60 | 31.00  | 650.90 | 761.00 | 3.00 | 3.00 |
| VTi | 1.94 | 2.07 | 2.68 | 1.63 | 1.54 | 50.60 | 7.60   | 650.90 | 658.80 | 3.00 | 2.00 |
| VW  | 1.96 | 2.08 | 2.78 | 1.63 | 2.36 | 50.60 | 78.60  | 650.90 | 770.00 | 3.00 | 4.00 |
| VZr | 1.97 | 2.13 | 2.75 | 1.63 | 1.33 | 50.60 | 41.10  | 650.90 | 640.10 | 3.00 | 2.00 |

---

**Table S2.** Machine learning hyperparameters.

| Algorithm | Hyperparameter                                                                                                                          |
|-----------|-----------------------------------------------------------------------------------------------------------------------------------------|
| ABR       | learning_rate = 0.85, n_estimators = 67, random_state = 55                                                                              |
| RFR       | n_estimators = 6, random_state = 72                                                                                                     |
| XGBR      | n_estimators = 5, learning_rate = 0.75, max_depth = 3, random_state = 1                                                                 |
| GBR       | n_estimators = 135, max_depth = 4, learning_rate = 0.04, subsample = 0.45,<br>min_samples_split = 3, loss = 'huber', random_state = 894 |
